# Supplementary material for: Fascinating interlocked triacontanuclear giant nanocages
Source: Royal Society of Chemistry journal article supplement (doi:10.1039/d1cc02990h), 2021-01-01
Supplement: d1cc02990h1.pdf [file d1cc02990h1.pdf]

## **Supporting Information File**

# **Fascinating Interlocked Triacontanuclear Giant Nanocages**

Sukhen Bala, Sohel Akhtar, Jun-Liang Liu, Guo-Zhang Huang, Si-Guo Wu, Avik De, Krishna Sundar Das, Sayan Saha, Ming-Liang Tong\* and Raju Mondal\*

## Experimental Section

All reagents used in the present work were obtained commercial sources and were used without further purification unless otherwise stated. FT-IR spectra were obtained on a Nicolet MAGNA-IR 750 spectrometer with samples prepared as KBr pellets. C, H and N microanalyses were carried out with a 2400 Series-II CHN Analyzer; Perkin–Elmer, USA. Magnetic susceptibility measurements were collected using a Quantum Design MPMS-XL7 SQUID magnetometer and a Quantum Design PPMS VSM. Polycrystalline samples were embedded in Vaseline to prevent torqueing. All data were corrected for the diamagnetic contribution. Thermal analyses were carried out with a TA Instruments SDT Q600 under nitrogenous atmosphere with a flow rate of 100 mL/min and Powder X-ray diffraction patterns were collected on a Bruker D8 ADVANCE instrument. JEOL JEM 2010 high-resolution microscope instrument used for TEM experiment.

**X-ray Crystallography:** Diffraction intensities were collected on a Bruker D8 QUEST diffractometer with Mo- $K_{\alpha}$  radiation ( $\lambda = 0.71073\text{\AA}$ ) for the cages at 120 K. The structures were solved by SHELXT and all non-hydrogen atoms were refined by least-squares on  $F^2$  utilizing the SHELXTL program suite and Olex2.<sup>1</sup> All hydrogen atoms were generated geometrically and refined isotropically using the riding model. Crystallographic data are summarized in Table S3, and CIF files for the structures reported in this paper have been deposited with the Cambridge Crystallographic Data Centre (CCDC). Deposition numbers are given in Table S3. Copies of the data can be obtained, free of charge, on application to the CCDC, 12 Union Road, Cambridge CB2 1EZ UK (Fax 44 (1223)336 033; E-mail: deposit@ccdc.cam.ac.uk).

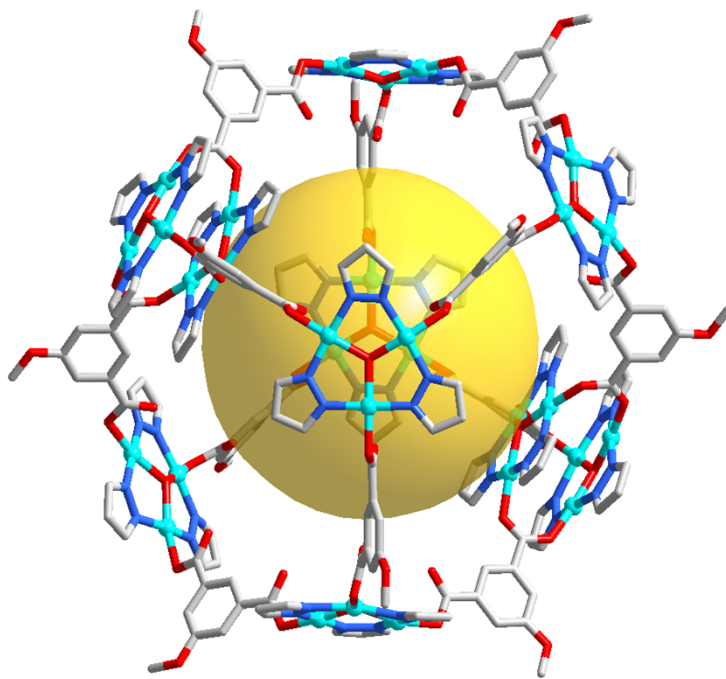

**Fig. S1.** Molecular structure of compound **MeO-Cu<sub>30</sub>** showing hollow spherical metallocage resulted from joining Cluster-I and Cluster-II with 5-methoxy isophthalic acid.

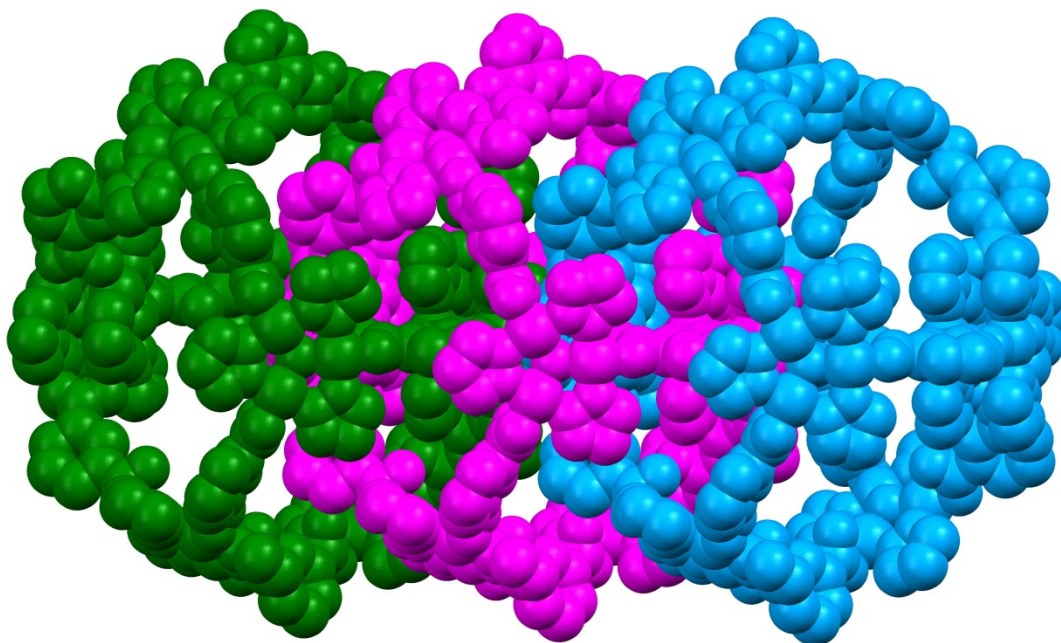

**Fig. S2.** A space-filled representation of three-fold interpenetrated metallocage.

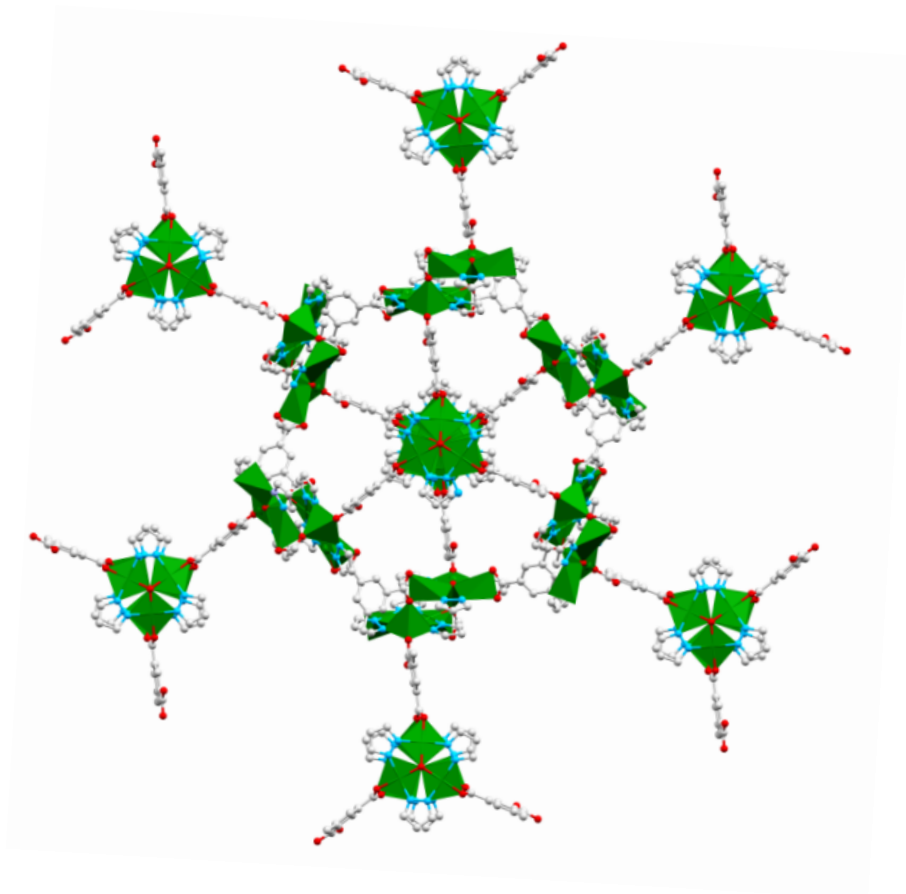

**Fig. S3.** Crystal structure of compound Me-Cu30 showing the polymeric nature and expansion of Cluster-Is via pi-pi stacking between the pyrazole moieties and metal-metal interaction.

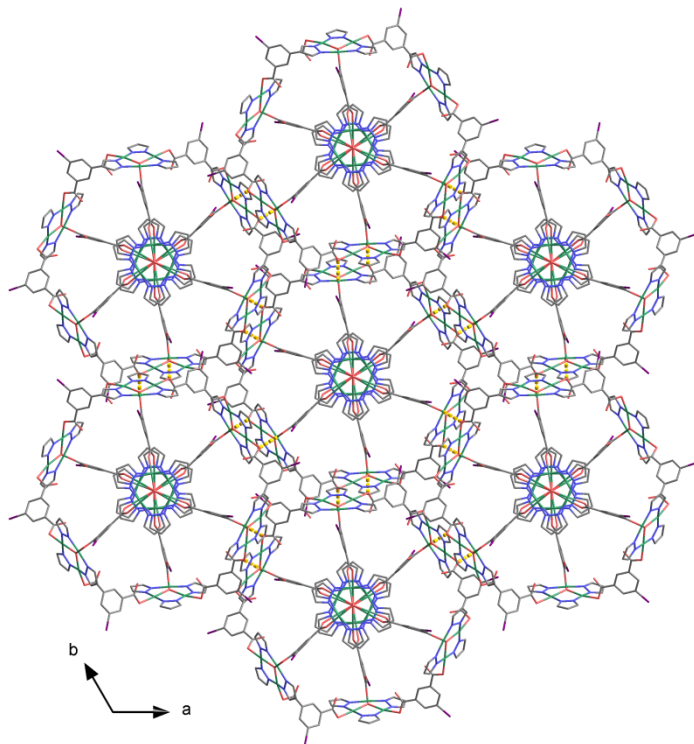

**Fig. S4.** Extended network of  $\text{Br-Cu}_{30}$

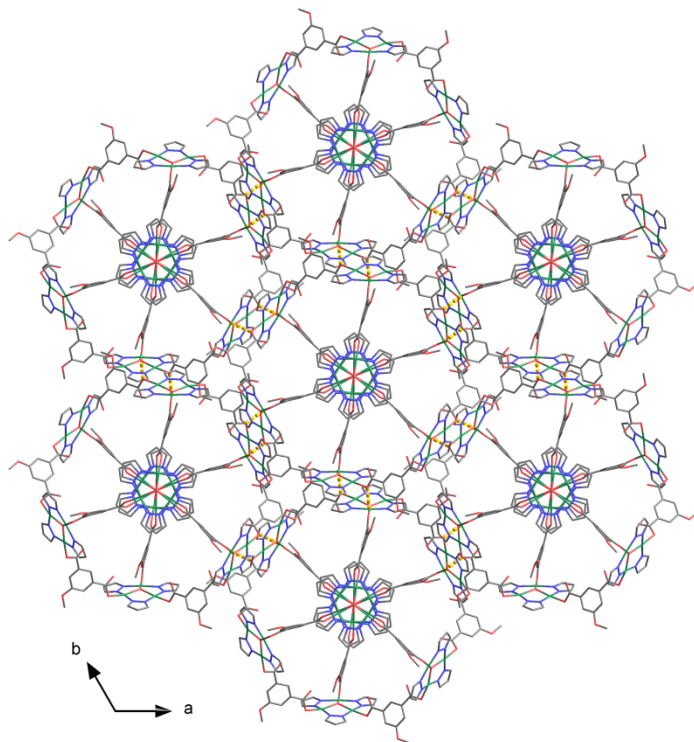

**Fig. S5.** Extended network of  $\text{MeO-Cu}_{30}$

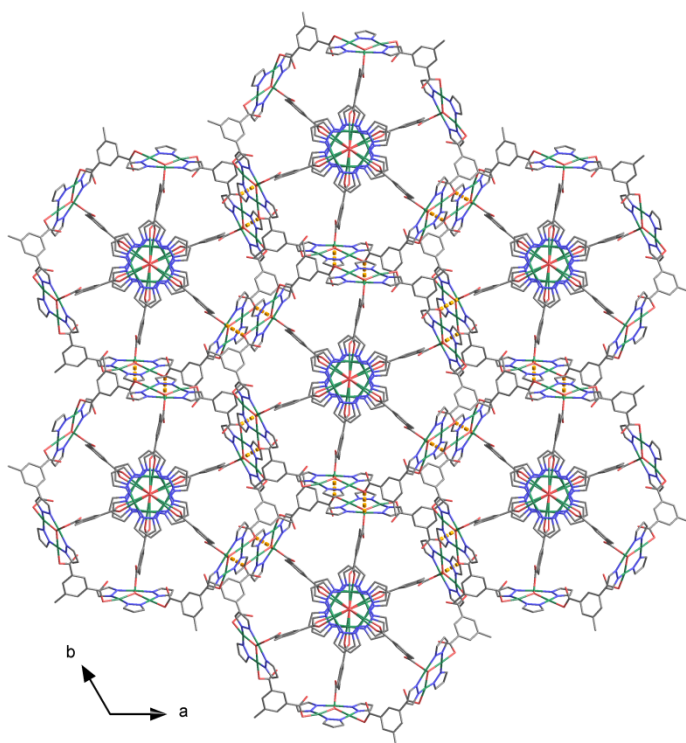

**Fig. S6.** Extended network of **Me-Cu<sub>30</sub>**

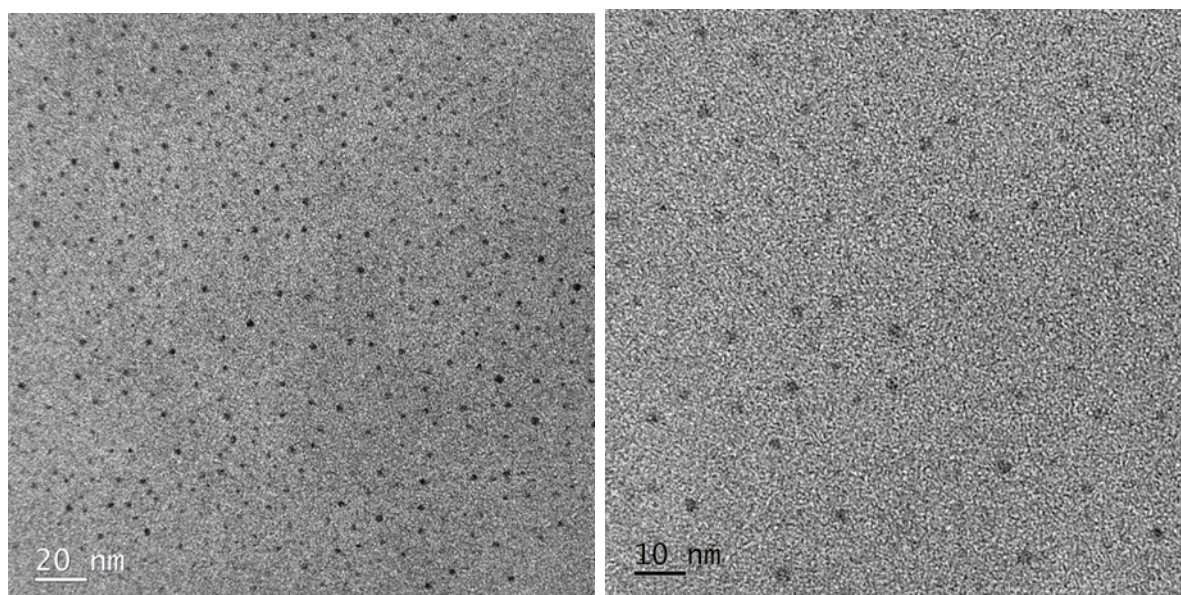

**Fig. S7.** HRTEM images showing the discretely existing nanocage of **Br-Cu<sub>30</sub>**.

The above studies unequivocally confirm the nanoscale-dimensions of metallocages with detail structural information at the molecular level. The obvious question then arose, do these metallocages of nano-dimensions are nanodimensional? Do above molecular cages exist in nano-dimension? Do they qualify as nanomaterials? It was gratifying to note that the answers are affirmative with corroborating morphological data from high resolution



transmission electron microscopy (HRTEM). In order to tackle above questions through microscopic studies were carried out for all three compounds. The sample was prepared by sonicating the nanocage in methanol for 8 hours. It was then carefully drop casted on a carbon coated copper grid (Cu, 300 mesh) and left overnight for drying up. TEM images provided visualization of the nanocage displaying both uniform size and the shapes of the dispersed molecule. The measured diameter are in the range of 3.2-3.4 nm which are well agreement with the size shown in crystallographic structure's outer diameter.

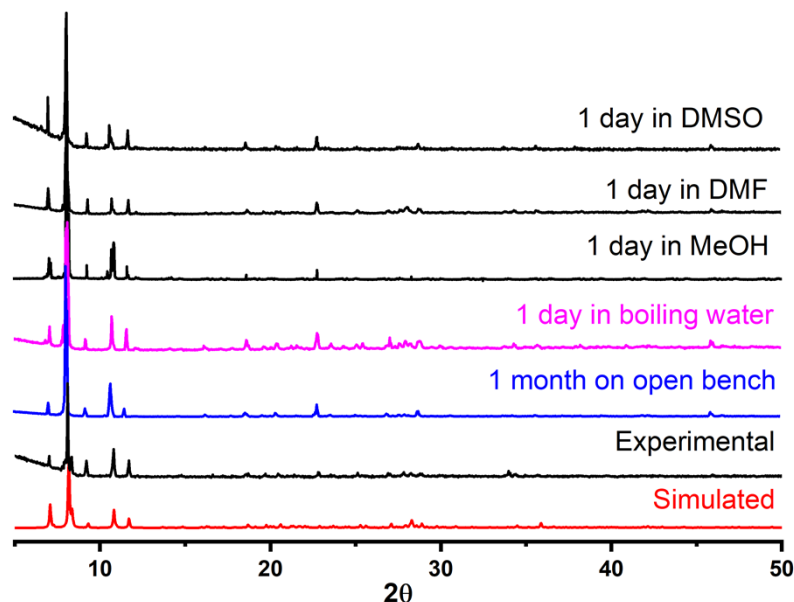

Fig. S8: PXRD patterns of  $\text{Br-Cu}_{30}$  after treatment under different condition.

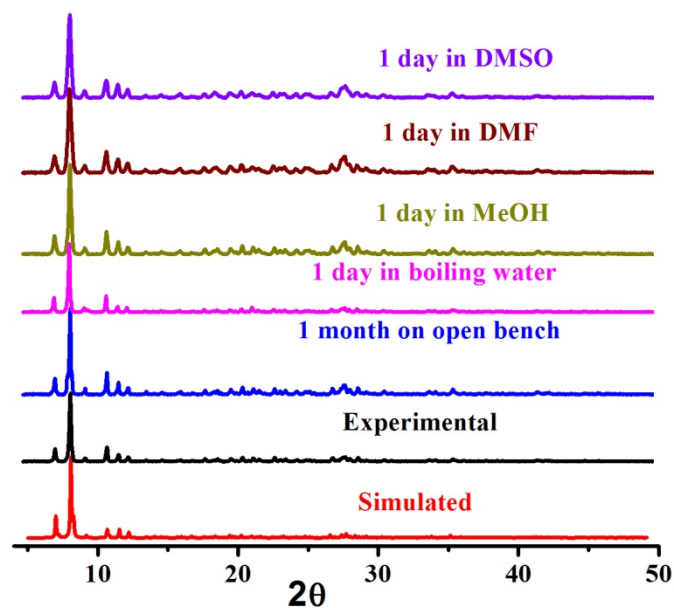

Fig. S9: PXRD patterns of  $\text{MeO-Cu}_{30}$  after treatment under different condition.

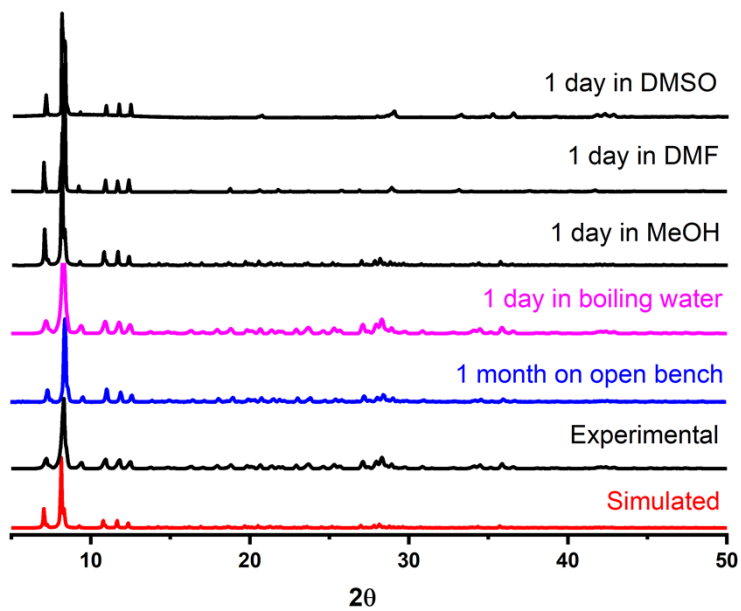

Fig. S10: PXRD patterns of  $\text{Me-Cu}_{30}$  after treatment under different condition.

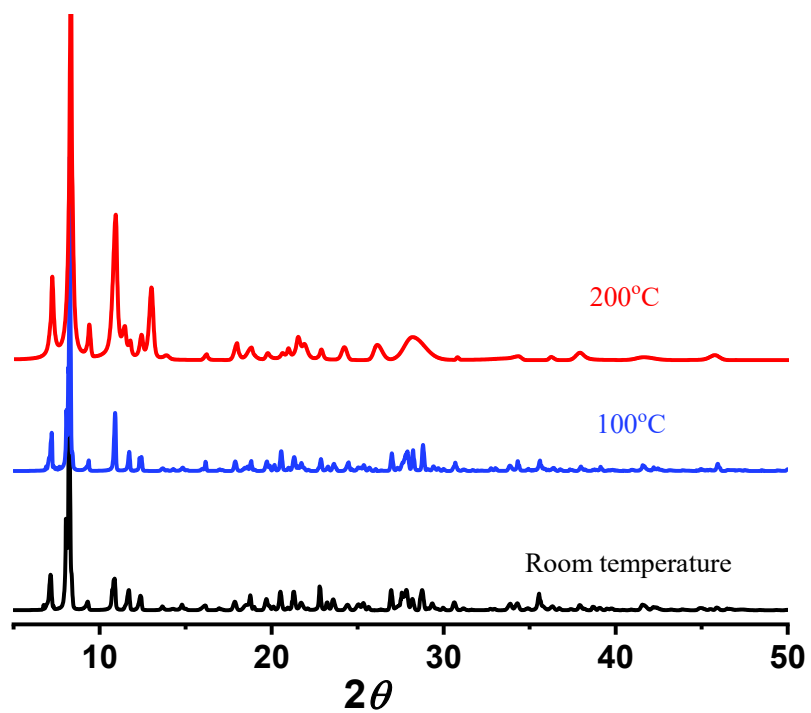

Fig. S11: PXRD patterns of  $\text{MeO-Cu}_{30}$  at different temperature.



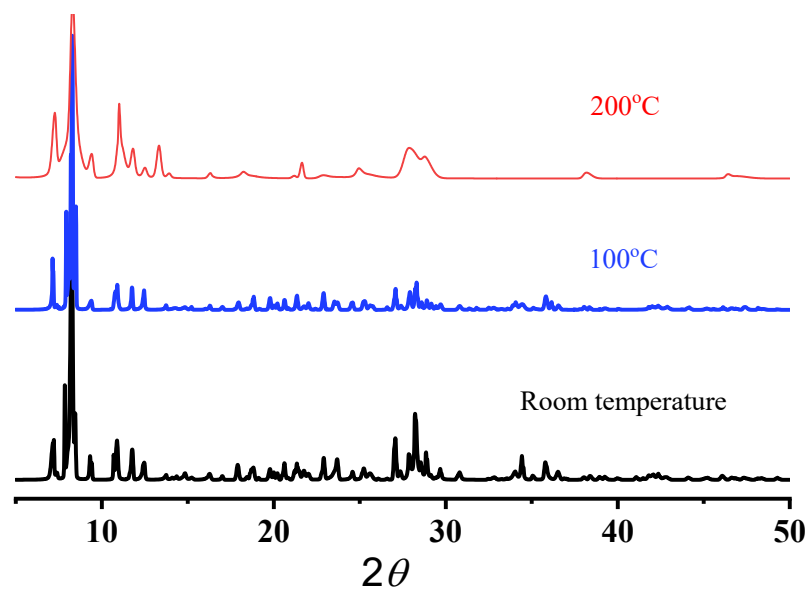

Fig. S12: PXRD patterns of Me-Cu<sub>30</sub> at different temperature.

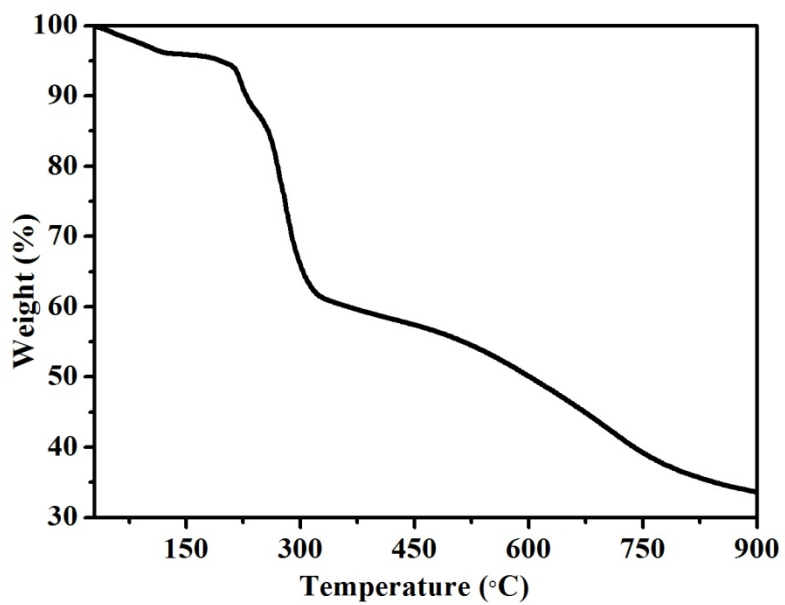

Fig. S13: TGA plots of Br-Cu<sub>30</sub> under N<sub>2</sub> atmosphere.

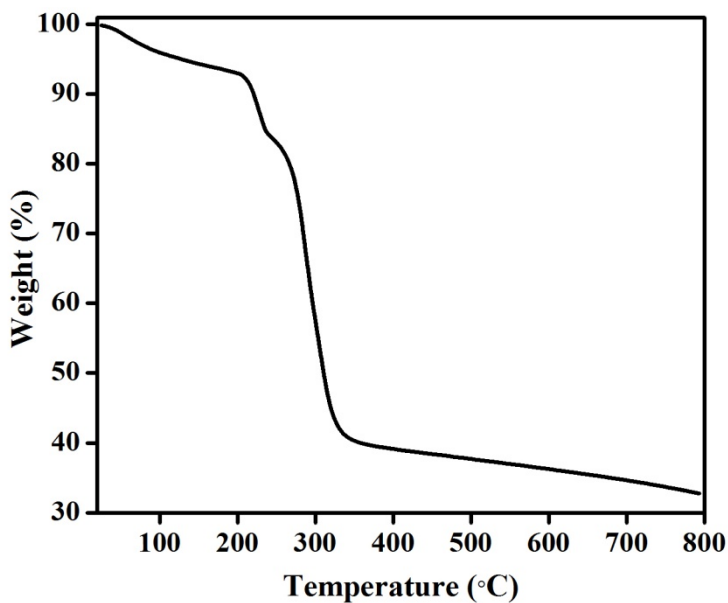

Fig. S14: TGA plots of MeO-Cu<sub>30</sub> under N<sub>2</sub> atmosphere.

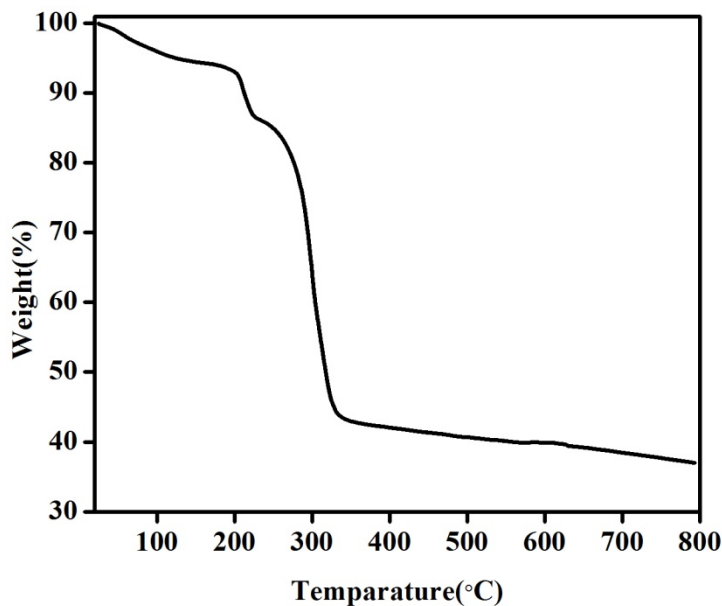

Fig. S15: TGA plots of Me-Cu<sub>30</sub> under N<sub>2</sub> atmosphere.

The thermogravimetric analyses of three compounds were performed in platinum crucible at a rate of 10°C per minute under nitrogenous atmosphere within the range of 25°-800°C. The TGA curve revealed that the framework is stable over 250 °C which signify that our nanocages are highly stable and can be useful for further applications at high temperature. Furthermore, the chemical stability of all the cages was determined by PXRD when it was kept in open air and in water for one month. The cages were stable to other various organic solvents like methanol, dimethyl formamide, dimethyl sulphoxide etc. which are shown in figure8. The PXRD pattern of these cages was similar with the simulated pattern which confirms excellent chemical stability in these solvents. The thermal and chemical

stability may be arising due to the interpenetration between the cage and strong interaction between the adjacent CuII centres (Cu...Cu separation 3.4 Å) bridged by pyrazole moiety. To the best of our knowledge, this is the first example where pyrazole based Cu<sub>30</sub>nanocages with two types of inorganic cluster motif showed remarkable such kind of high thermal and chemical stability

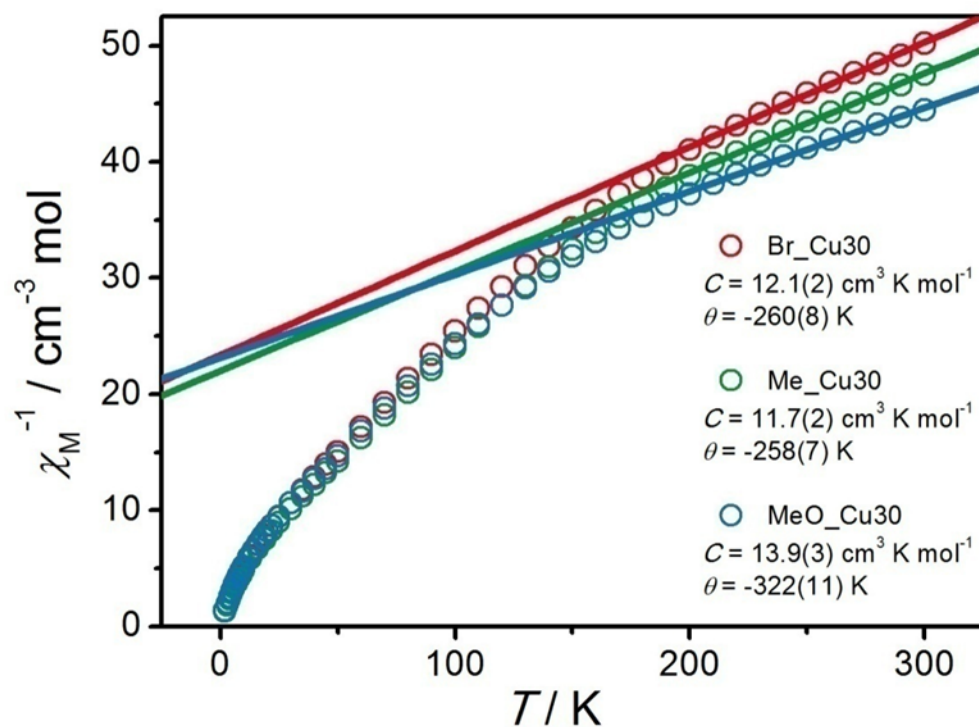

Fig. S16: Curie-Weiss fitting for Br-Cu<sub>30</sub>, MeO-Cu<sub>30</sub> and Me-Cu<sub>30</sub>.

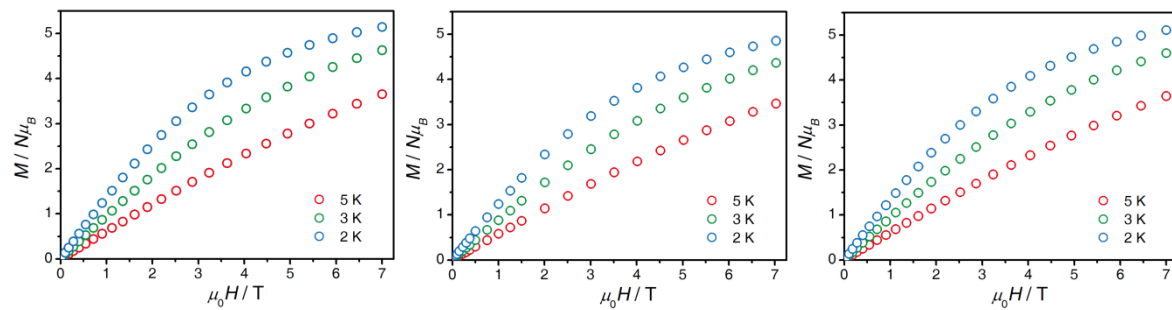

Fig. S17: Field dependence magnetization for Br-Cu<sub>30</sub> (left), MeO-Cu<sub>30</sub> (middle) and Me-Cu<sub>30</sub> (right).

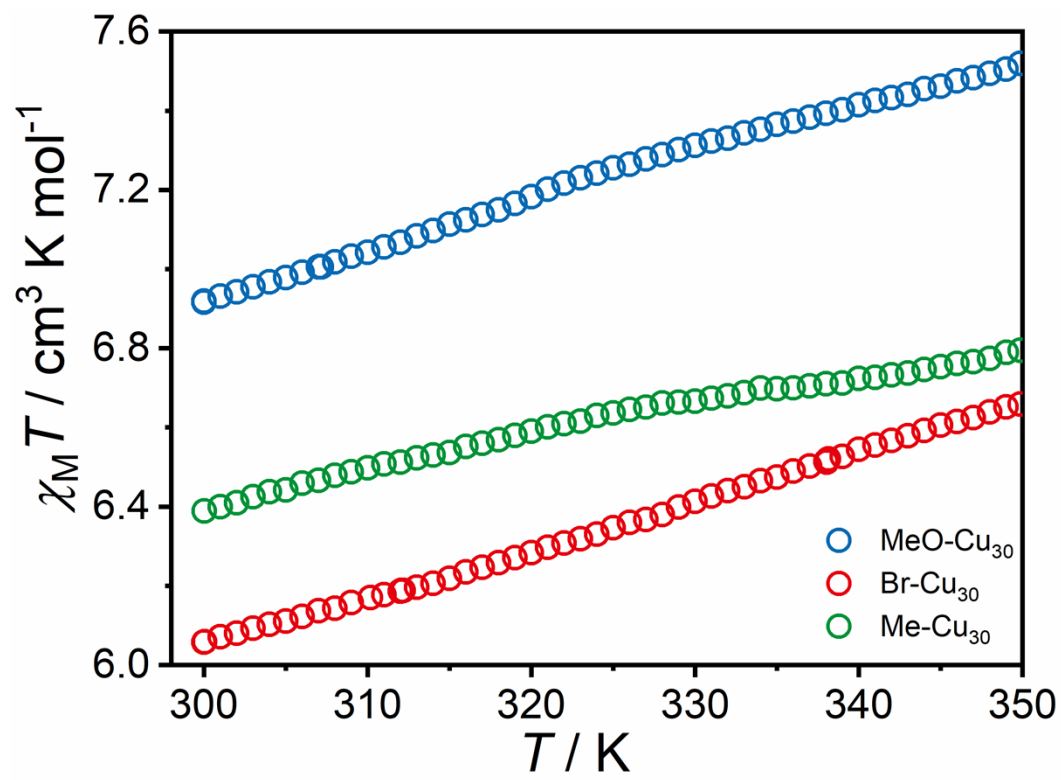

**Fig. S18:** Temperature dependence of  $\chi_M T$  for Br-Cu<sub>30</sub>, MeO-Cu<sub>30</sub> and Me-Cu<sub>30</sub> in the temperature range of 300-350K

**Table S1: Selected bond lengths of cages**

| <b>Br-Cu<sub>30</sub></b>                     | <b>MeO-Cu<sub>30</sub></b>                    | <b>Me-Cu<sub>30</sub></b>                     |
|-----------------------------------------------|-----------------------------------------------|-----------------------------------------------|
| Cu <sub>1</sub> ...O <sub>1S</sub> 1.996(3)   | Cu <sub>1</sub> ...O <sub>1S</sub> 1.981(3)   | Cu <sub>1</sub> ...O <sub>1S</sub> 1.982(3)   |
| Cu <sub>1</sub> ...O <sub>1A</sub> 1.967(4)   | Cu <sub>1</sub> ...O <sub>1</sub> 1.954(3)    | Cu <sub>1</sub> ...O <sub>1</sub> 1.987(4)    |
| Cu <sub>1</sub> ...N <sub>2B</sub> 1.934(4)   | Cu <sub>1</sub> ...N <sub>1A</sub> 1.936(4)   | Cu <sub>1</sub> ...N <sub>1</sub> 1.926(5)    |
| Cu <sub>1</sub> ...N <sub>2A</sub> 1.947(4)   | Cu <sub>1</sub> ...N <sub>1B</sub> 1.948(3)   | Cu <sub>1</sub> ...N <sub>2B</sub> 1.947(5)   |
| Cu <sub>2</sub> ...O <sub>1S</sub> 1.985(3)   | Cu <sub>2</sub> ...O <sub>1S</sub> 1.990(3)   | Cu <sub>2</sub> ...O <sub>1S</sub> 1.976(3)   |
| Cu <sub>2</sub> ...O <sub>1</sub> 1.992(4)    | Cu <sub>2</sub> ...O <sub>3</sub> 1.992(3)    | Cu <sub>2</sub> ...O <sub>3</sub> 1.965(4)    |
| Cu <sub>2</sub> ...N <sub>1B</sub> 1.950(5)   | Cu <sub>2</sub> ...N <sub>1</sub> 1.935(4)    | Cu <sub>2</sub> ...N <sub>2</sub> 1.934(5)    |
| Cu <sub>2</sub> ...N <sub>1</sub> 1.931(5)    | Cu <sub>2</sub> ...N <sub>2A</sub> 1.930(4)   | Cu <sub>2</sub> ...N <sub>1A</sub> 1.946(5)   |
| Cu <sub>3</sub> ...O <sub>1S</sub> 1.969(3)   | Cu <sub>3</sub> ...O <sub>1S</sub> 2.003(3)   | Cu <sub>3</sub> ...O <sub>1S</sub> 2.001(4)   |
| Cu <sub>3</sub> ...O <sub>3</sub> 1.955(4)    | Cu <sub>3</sub> ...O <sub>1A</sub> 1.972(3)   | Cu <sub>3</sub> ...O <sub>1A</sub> 1.969(4)   |
| Cu <sub>3</sub> ...N <sub>2</sub> 1.936(5)    | Cu <sub>3</sub> ...N <sub>2</sub> 1.937(3)    | Cu <sub>3</sub> ...N <sub>2A</sub> 1.952(5)   |
| Cu <sub>3</sub> ...N <sub>1A</sub> 1.951(4)   | Cu <sub>3</sub> ...N <sub>2B</sub> 1.949(3)   | Cu <sub>3</sub> ...N <sub>1B</sub> 1.933(4)   |
| Cu <sub>4</sub> ...O <sub>2S</sub> 1.9321(14) | Cu <sub>4</sub> ...O <sub>2S</sub> 1.9374(10) | Cu <sub>4</sub> ...O <sub>2S</sub> 1.9337(13) |
| Cu <sub>4</sub> ...O <sub>4A</sub> 1.947(5)   | Cu <sub>4</sub> ...O <sub>3A</sub> 1.954(3)   | Cu <sub>4</sub> ...O <sub>4A</sub> 1.956(4)   |
| Cu <sub>4</sub> ...N <sub>2D</sub> 1.921(6)   | Cu <sub>4</sub> ...N <sub>1C</sub> 1.917(4)   | Cu <sub>4</sub> ...N <sub>1C</sub> 1.925(6)   |
| Cu <sub>4</sub> ...N <sub>1D</sub> 1.942(6)   | Cu <sub>4</sub> ...N <sub>2C</sub> 1.948(4)   | Cu <sub>4</sub> ...N <sub>2C</sub> 1.916(6)   |
| Cu <sub>5</sub> ...O <sub>3S</sub> 1.9317(15) | Cu <sub>5</sub> ...O <sub>3S</sub> 1.9314(10) | Cu <sub>5</sub> ...O <sub>3S</sub> 1.9369(12) |
| Cu <sub>5</sub> ...O <sub>3A</sub> 1.957(4)   | Cu <sub>5</sub> ...O <sub>4A</sub> 1.946(4)   | Cu <sub>5</sub> ...O <sub>3A</sub> 1.970(5)   |
| Cu <sub>5</sub> ...N <sub>2C</sub> 1.931(5)   | Cu <sub>5</sub> ...N <sub>1D</sub> 1.945(6)   | Cu <sub>5</sub> ...N <sub>1D</sub> 1.886(6)   |
| Cu <sub>5</sub> ...N <sub>1C</sub> 1.929(5)   | Cu <sub>5</sub> ...N <sub>2D</sub> 1.897(5)   | Cu <sub>5</sub> ...N <sub>2D</sub> 1.974(7)   |

**Table S2: Selected bond angles of cages**

| <b>Br-Cu<sub>30</sub></b>                                        | <b>MeO-Cu<sub>30</sub></b>                                       | <b>Me-Cu<sub>30</sub></b>                                        |
|------------------------------------------------------------------|------------------------------------------------------------------|------------------------------------------------------------------|
| O <sub>1A</sub> ...Cu <sub>1</sub> ...O <sub>1S</sub> 166.09(15) | O <sub>1</sub> ...Cu <sub>1</sub> ...O <sub>1S</sub> 174.90(13)  | O <sub>1S</sub> ...Cu <sub>1</sub> ...O <sub>1</sub> 169.25(15)  |
| N <sub>2B</sub> ...Cu <sub>1</sub> ...O <sub>1S</sub> 88.46(16)  | N <sub>1A</sub> ...Cu <sub>1</sub> ...O <sub>1S</sub> 89.82(13)  | N <sub>1</sub> ...Cu <sub>1</sub> ...O <sub>1S</sub> 89.86(17)   |
| N <sub>2B</sub> ...Cu <sub>1</sub> ...O <sub>1A</sub> 92.59(18)  | N <sub>1A</sub> ...Cu <sub>1</sub> ...O <sub>1</sub> 91.20(14)   | N <sub>1</sub> ...Cu <sub>1</sub> ...O <sub>1</sub> 92.39(18)    |
| N <sub>2B</sub> ...Cu <sub>1</sub> ...N <sub>2A</sub> 175.56(19) | N <sub>1A</sub> ...Cu <sub>1</sub> ...N <sub>1B</sub> 175.44(15) | N <sub>1</sub> ...Cu <sub>1</sub> ...N <sub>2B</sub> 173.2(2)    |
| N <sub>2A</sub> ...Cu <sub>1</sub> ...O <sub>1S</sub> 88.34(16)  | N <sub>1B</sub> ...Cu <sub>1</sub> ...O <sub>1S</sub> 88.51(13)  | N <sub>2B</sub> ...Cu <sub>1</sub> ...O <sub>1S</sub> 89.42(17)  |
| N <sub>2A</sub> ...Cu <sub>1</sub> ...O <sub>1A</sub> 91.25(17)  | N <sub>1B</sub> ...Cu <sub>1</sub> ...O <sub>1</sub> 90.84(13)   | N <sub>2B</sub> ...Cu <sub>1</sub> ...O <sub>1</sub> 89.56(18)   |
| O <sub>1S</sub> ...Cu <sub>2</sub> ...O <sub>1</sub> 168.67(15)  | O <sub>1S</sub> ...Cu <sub>2</sub> ...O <sub>3</sub> 164.61(12)  | O <sub>3</sub> ...Cu <sub>2</sub> ...O <sub>1S</sub> 178.57(15)  |
| N <sub>1B</sub> ...Cu <sub>2</sub> ...O <sub>1S</sub> 89.49(16)  | N <sub>1</sub> ...Cu <sub>2</sub> ...O <sub>1S</sub> 89.80(13)   | N <sub>2</sub> ...Cu <sub>2</sub> ...O <sub>1S</sub> 89.71(17)   |
| N <sub>1B</sub> ...Cu <sub>2</sub> ...O <sub>1</sub> 89.85(17)   | N <sub>1</sub> ...Cu <sub>2</sub> ...O <sub>3</sub> 90.14(13)    | N <sub>2</sub> ...Cu <sub>2</sub> ...O <sub>3</sub> 91.14(18)    |
| N <sub>1</sub> ...Cu <sub>2</sub> ...O <sub>1S</sub> 89.81(17)   | N <sub>2A</sub> ...Cu <sub>2</sub> ...O <sub>1S</sub> 90.09(13)  | N <sub>2</sub> ...Cu <sub>2</sub> ...N <sub>1A</sub> 177.9(2)    |
| N <sub>1</sub> ...Cu <sub>2</sub> ...O <sub>1</sub> 91.99(17)    | N <sub>2A</sub> ...Cu <sub>2</sub> ...O <sub>3</sub> 92.96(13)   | N <sub>1A</sub> ...Cu <sub>2</sub> ...O <sub>1S</sub> 88.51(17)  |
| N <sub>1</sub> ...Cu <sub>2</sub> ...N <sub>1B</sub> 174.1(2)    | N <sub>2A</sub> ...Cu <sub>2</sub> ...N <sub>1</sub> 168.66(16)  | N <sub>1A</sub> ...Cu <sub>2</sub> ...O <sub>3</sub> 90.66(18)   |
| O <sub>3</sub> ...Cu <sub>3</sub> ...O <sub>1S</sub> 178.33(15)  | O <sub>1A</sub> ...Cu <sub>3</sub> ...O <sub>1S</sub> 166.49(12) | O <sub>1A</sub> ...Cu <sub>3</sub> ...O <sub>1S</sub> 165.29(15) |
| N <sub>2</sub> ...Cu <sub>3</sub> ...O <sub>1S</sub> 89.76(16)   | N <sub>2</sub> ...Cu <sub>3</sub> ...O <sub>1S</sub> 88.68(13)   | N <sub>2A</sub> ...Cu <sub>3</sub> ...O <sub>1S</sub> 87.99(17)  |
| N <sub>2</sub> ...Cu <sub>3</sub> ...O <sub>3</sub> 91.08(18)    | N <sub>2</sub> ...Cu <sub>3</sub> ...O <sub>1A</sub> 92.49(14)   | N <sub>2A</sub> ...Cu <sub>3</sub> ...O <sub>1A</sub> 90.89(18)  |
| N <sub>2</sub> ...Cu <sub>3</sub> ...N <sub>1A</sub> 177.76(18)  | N <sub>2</sub> ...Cu <sub>3</sub> ...N <sub>2B</sub> 174.96(15)  | N <sub>1B</sub> ...Cu <sub>3</sub> ...O <sub>1S</sub> 88.29(17)  |
| N <sub>1A</sub> ...Cu <sub>3</sub> ...O <sub>1S</sub> 88.47(16)  | N <sub>2B</sub> ...Cu <sub>3</sub> ...O <sub>1S</sub> 87.98(12)  | N <sub>1B</sub> ...Cu <sub>3</sub> ...O <sub>1A</sub> 93.30(18)  |
| N <sub>1A</sub> ...Cu <sub>3</sub> ...O <sub>3</sub> 90.72(17)   | N <sub>2B</sub> ...Cu <sub>3</sub> ...O <sub>1A</sub> 91.64(14)  | N <sub>1B</sub> ...Cu <sub>3</sub> ...N <sub>2A</sub> 175.59(19) |
| O <sub>2S</sub> ...Cu <sub>4</sub> ...O <sub>4A</sub> 176.5(2)   | O <sub>2S</sub> ...Cu <sub>4</sub> ...O <sub>3A</sub> 176.24(16) | O <sub>2S</sub> ...Cu <sub>4</sub> ...O <sub>4A</sub> 175.0(2)   |
| O <sub>2S</sub> ...Cu <sub>4</sub> ...N <sub>1D</sub> 88.89(18)  | O <sub>2S</sub> ...Cu <sub>4</sub> ...N <sub>2C</sub> 88.81(11)  | N <sub>1C</sub> ...Cu <sub>4</sub> ...O <sub>2S</sub> 89.06(19)  |
| N <sub>2D</sub> ...Cu <sub>4</sub> ...O <sub>2S</sub> 89.35(19)  | N <sub>1C</sub> ...Cu <sub>4</sub> ...O <sub>2S</sub> 89.24(12)  | N <sub>1C</sub> ...Cu <sub>4</sub> ...O <sub>4A</sub> 90.3(3)    |
| N <sub>2D</sub> ...Cu <sub>4</sub> ...O <sub>4A</sub> 91.7(3)    | N <sub>1C</sub> ...Cu <sub>4</sub> ...O <sub>3A</sub> 91.08(16)  | N <sub>2C</sub> ...Cu <sub>4</sub> ...O <sub>2S</sub> 89.33(19)  |
| N <sub>2D</sub> ...Cu <sub>4</sub> ...N <sub>1D</sub> 174.8(2)   | N <sub>1C</sub> ...Cu <sub>4</sub> ...N <sub>2C</sub> 174.73(15) | N <sub>2C</sub> ...Cu <sub>4</sub> ...O <sub>4A</sub> 91.8(3)    |
| N <sub>1D</sub> ...Cu <sub>4</sub> ...O <sub>4A</sub> 90.3(3)    | N <sub>2C</sub> ...Cu <sub>4</sub> ...O <sub>3A</sub> 91.18(16)  | N <sub>2C</sub> ...Cu <sub>4</sub> ...N <sub>1C</sub> 173.6(2)   |
| O <sub>3S</sub> ...Cu <sub>5</sub> ...O <sub>3A</sub> 175.1(2)   | O <sub>3S</sub> ...Cu <sub>5</sub> ...O <sub>4A</sub> 174.78(18) | O <sub>3S</sub> ...Cu <sub>5</sub> ...O <sub>3A</sub> 175.6(2)   |
| N <sub>2C</sub> ...Cu <sub>5</sub> ...O <sub>3S</sub> 89.47(16)  | O <sub>3S</sub> ...Cu <sub>5</sub> ...N <sub>1D</sub> 88.89(17)  | O <sub>3S</sub> ...Cu <sub>5</sub> ...N <sub>2D</sub> 87.40(19)  |
| N <sub>2C</sub> ...Cu <sub>5</sub> ...O <sub>3A</sub> 91.9(2)    | N <sub>1D</sub> ...Cu <sub>5</sub> ...O <sub>4A</sub> 89.8(3)    | O <sub>3A</sub> ...Cu <sub>5</sub> ...N <sub>2D</sub> 91.3(3)    |
| N <sub>1C</sub> ...Cu <sub>5</sub> ...O <sub>3S</sub> 89.15(16)  | N <sub>2D</sub> ...Cu <sub>5</sub> ...O <sub>3S</sub> 89.50(17)  | N <sub>1D</sub> ...Cu <sub>5</sub> ...O <sub>3S</sub> 89.96(19)  |
| N <sub>1C</sub> ...Cu <sub>5</sub> ...O <sub>3A</sub> 90.0(2)    | N <sub>2D</sub> ...Cu <sub>5</sub> ...O <sub>4A</sub> 92.4(3)    | N <sub>1D</sub> ...Cu <sub>5</sub> ...O <sub>3A</sub> 91.7(3)    |
| N <sub>1C</sub> ...Cu <sub>5</sub> ...N <sub>2C</sub> 173.7(2)   | N <sub>2D</sub> ...Cu <sub>5</sub> ...N <sub>1D</sub> 173.52(17) | N <sub>1D</sub> ...Cu <sub>5</sub> ...N <sub>2D</sub> 174.2(2)   |



**Table S3: Crystallographic data and refinement parameters for nanocages.**

|                                                     | <b>Br-Cu<sub>30</sub></b>                                                                                | <b>MeO-Cu<sub>30</sub></b>                                                            | <b>Me-Cu<sub>30</sub></b>                                                                |
|-----------------------------------------------------|----------------------------------------------------------------------------------------------------------|---------------------------------------------------------------------------------------|------------------------------------------------------------------------------------------|
| Empirical formula                                   | C <sub>34.33</sub> H <sub>38</sub> Br <sub>2</sub> Cu <sub>5</sub> N <sub>10.67</sub> O <sub>12.67</sub> | C <sub>218</sub> H <sub>263.99</sub> Cu <sub>30</sub> N <sub>64</sub> O <sub>88</sub> | C <sub>36.33</sub> H <sub>44</sub> Cu <sub>5</sub> N <sub>10.67</sub> O <sub>12.67</sub> |
| Formula weight                                      | 1280.27                                                                                                  | 7094.99                                                                               | 1150.52                                                                                  |
| Crystal system                                      | Trigonal                                                                                                 | Trigonal                                                                              | Trigonal                                                                                 |
| Space group                                         | <i>R</i> -3                                                                                              | <i>R</i> -3                                                                           | <i>R</i> -3                                                                              |
| <i>a</i> /Å                                         | 43.2076(11)                                                                                              | 43.6103(11)                                                                           | 43.3455(13)                                                                              |
| <i>b</i> /Å                                         | 43.2076(11)                                                                                              | 43.6103(11)                                                                           | 43.3455(13)                                                                              |
| <i>c</i> /Å                                         | 12.7945(4)                                                                                               | 12.8640(3)                                                                            | 12.7232(4)                                                                               |
| <i>α</i> /°                                         | 90                                                                                                       | 90                                                                                    | 90                                                                                       |
| <i>β</i> /°                                         | 90                                                                                                       | 90                                                                                    | 90                                                                                       |
| <i>γ</i> /°                                         | 120                                                                                                      | 120                                                                                   | 120                                                                                      |
| <i>V</i> /Å <sup>3</sup>                            | 20685.9(12)                                                                                              | 21187.7(9)                                                                            | 20702.1(11)                                                                              |
| <i>Z</i>                                            | 18                                                                                                       | 3.00006                                                                               | 18                                                                                       |
| $\mu$ (Mo K $\alpha$ )/mm <sup>-1</sup>             | 4.086                                                                                                    | 2.296                                                                                 | 2.345                                                                                    |
| Goodness-of-fit on <i>F</i> <sup>2</sup>            | 1.058                                                                                                    | 1.032                                                                                 | 1.035                                                                                    |
| Radiation                                           | Mo K $\alpha$ ( $\lambda$ = 0.71073)                                                                     | Mo K $\alpha$ ( $\lambda$ = 0.71073)                                                  | Mo K $\alpha$ ( $\lambda$ = 0.71073)                                                     |
| Reflections Collected                               | 39468                                                                                                    | 32388                                                                                 | 55327                                                                                    |
| Independent reflections                             | 10529                                                                                                    | 10700                                                                                 | 10600                                                                                    |
| Final <i>R</i> indexes [ <i>I</i> ≥ 2σ( <i>I</i> )] | <i>R</i> <sub>1</sub> = 0.0581, <i>wR</i> <sub>2</sub> = 0.1382                                          | <i>R</i> <sub>1</sub> = 0.0506, <i>wR</i> <sub>2</sub> = 0.1225                       | <i>R</i> <sub>1</sub> = 0.0546, <i>wR</i> <sub>2</sub> = 0.1314                          |
| Final <i>R</i> indexes [all data]                   | <i>R</i> <sub>1</sub> = 0.0749, <i>wR</i> <sub>2</sub> = 0.1456                                          | <i>R</i> <sub>1</sub> = 0.0660, <i>wR</i> <sub>2</sub> = 0.1302                       | <i>R</i> <sub>1</sub> = 0.0662, <i>wR</i> <sub>2</sub> = 0.1378                          |
| Largest diff. peak/hole/eÅ <sup>-3</sup>            | 2.538/−2.452                                                                                             | 2.341/−1.772                                                                          | 2.785/−2.100                                                                             |
| CCDC no                                             | 2011020                                                                                                  | 2011018                                                                               | 2011019                                                                                  |

## References

- 1.a) G. M. Sheldrick, *Acta Crystallogr., Sect. C: Struct. Chem.*, 2015, **71**, 3; b) G. M. Sheldrick, *Acta Crystallogr., Sect. A: Found. Adv.* 2015, **71**, 3; c) O. V. Dolomanov, L. J. Bourhis, R. J. Gildea, J. A. K. Howard and H. Puschmann, *J. Appl. Crystallogr.* 2009, **42**, 339.
